# Supplementary material for: Efficient hydrogenation of furfural to furfuryl alcohol by recoverable copper tailings catalyst
Source: Royal Society of Chemistry journal article supplement (doi:10.1039/d6ra01723a), 2026-06-08
Supplement: d6ra01723a1.pdf [file d6ra01723a1.pdf]

Supplementary Information (SI) for RSC Advances.  
This journal is ©The Royal Society of Chemistry 2026

## Supporting Information

### Efficient hydrogenation of furfural to furfuryl alcohol by recoverable copper tailings catalyst

Lele Shang,<sup>a, b, d</sup> Weijun Dai,<sup>c</sup> Xiaolong Hao,<sup>c</sup> Dongbao Guo,<sup>a, b, d</sup> Xiao Li,<sup>a, d</sup> Yongjie Niu,<sup>a, b, d</sup>  
Yalong Yi,<sup>a, b, d</sup> Hao Wang,<sup>a, d</sup> Xiaobo Pan,<sup>\*, c</sup> Shuang Dai<sup>\*, a, b</sup>

<sup>a</sup>MNR Key Laboratory of Strategic Mineral Resources of the Upper Yellow River, School of Earth Sciences, Lanzhou University, Lanzhou 730000, China.

<sup>b</sup>MOE Key Laboratory of Western China's Environmental Systems, College of Earth and Environmental Sciences, Lanzhou University, Lanzhou 730000, China.

<sup>c</sup>College of Chemistry and Chemical Engineering, Lanzhou University, Lanzhou 730000, China.

<sup>d</sup>Lanzhou Mineral Exploration Institute of Gansu Nonferrous Metal Geological Exploration Bureau, Lanzhou 730000, China.

\*Corresponding author. E-mail addresses: [boxb@lzu.edu.cn](mailto:boxb@lzu.edu.cn); [daisher@lzu.edu.cn](mailto:daisher@lzu.edu.cn)

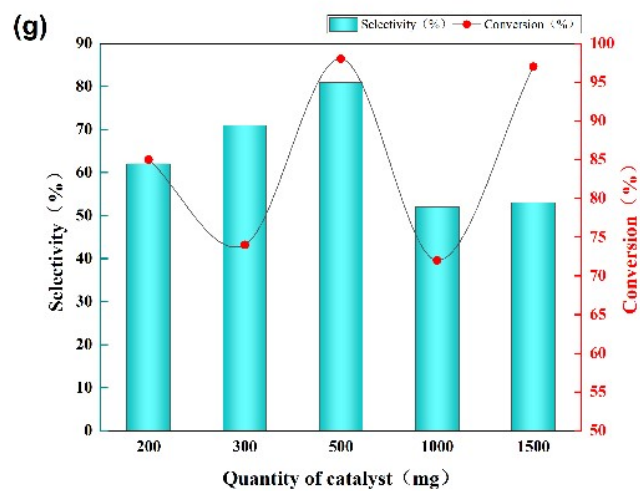

Fig. S1. Screening of the amount of CTC

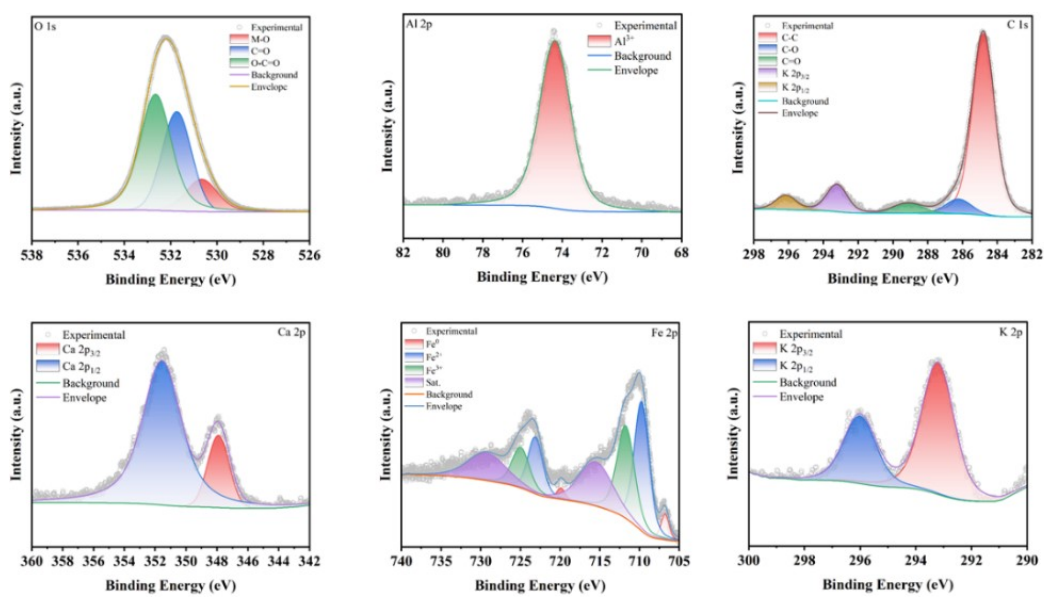

Fig. S2. High-resolution X-ray photoelectron spectroscopy spectra of the O 1s, Al 2p, C 1s, Ca 2p, Fe 2p, and K 2p peaks for the CTC.

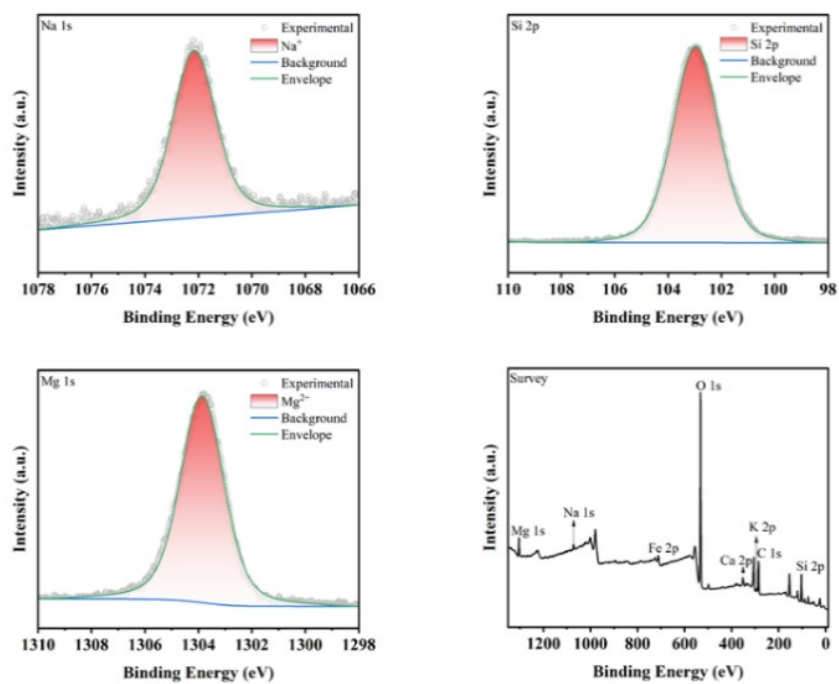

**Fig. S3.** High-resolution X-ray photoelectron spectroscopy spectra of the Na 1s, Si 2p, Mg 1s and survey spectrum for the CTC.

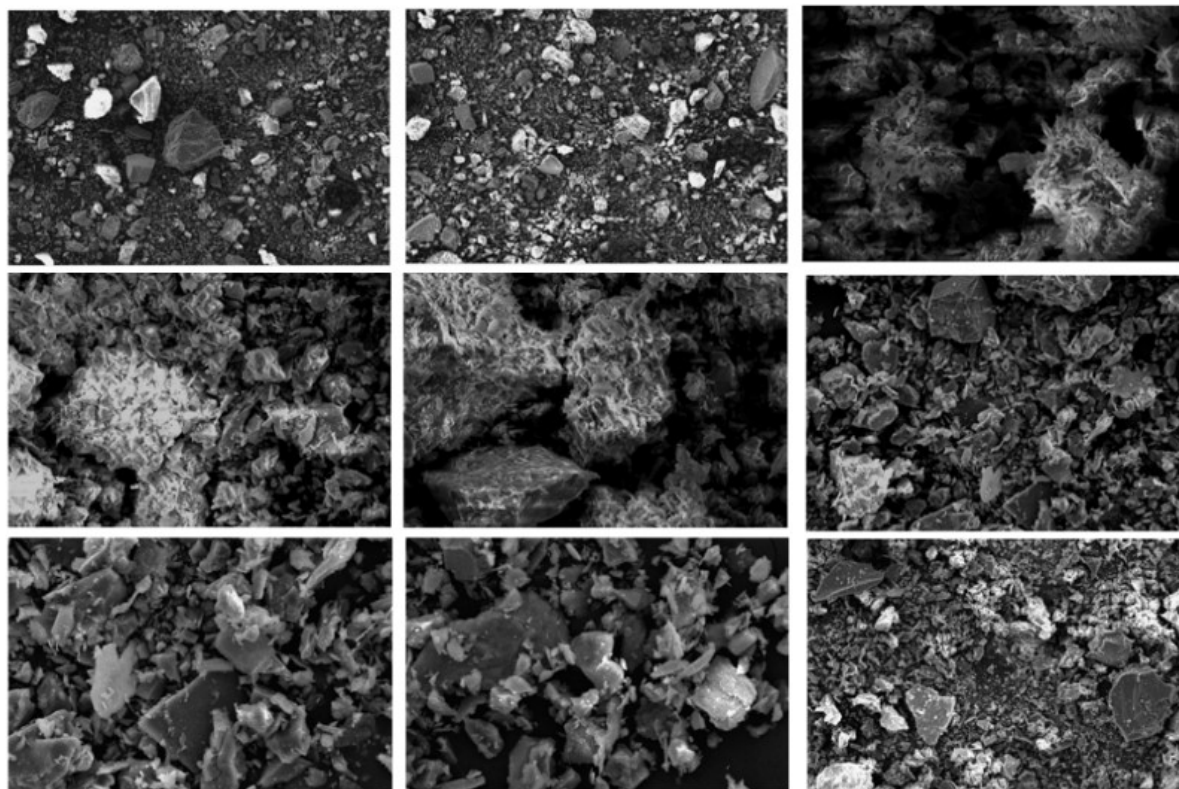

**Fig. S4.** SEM image of CTC

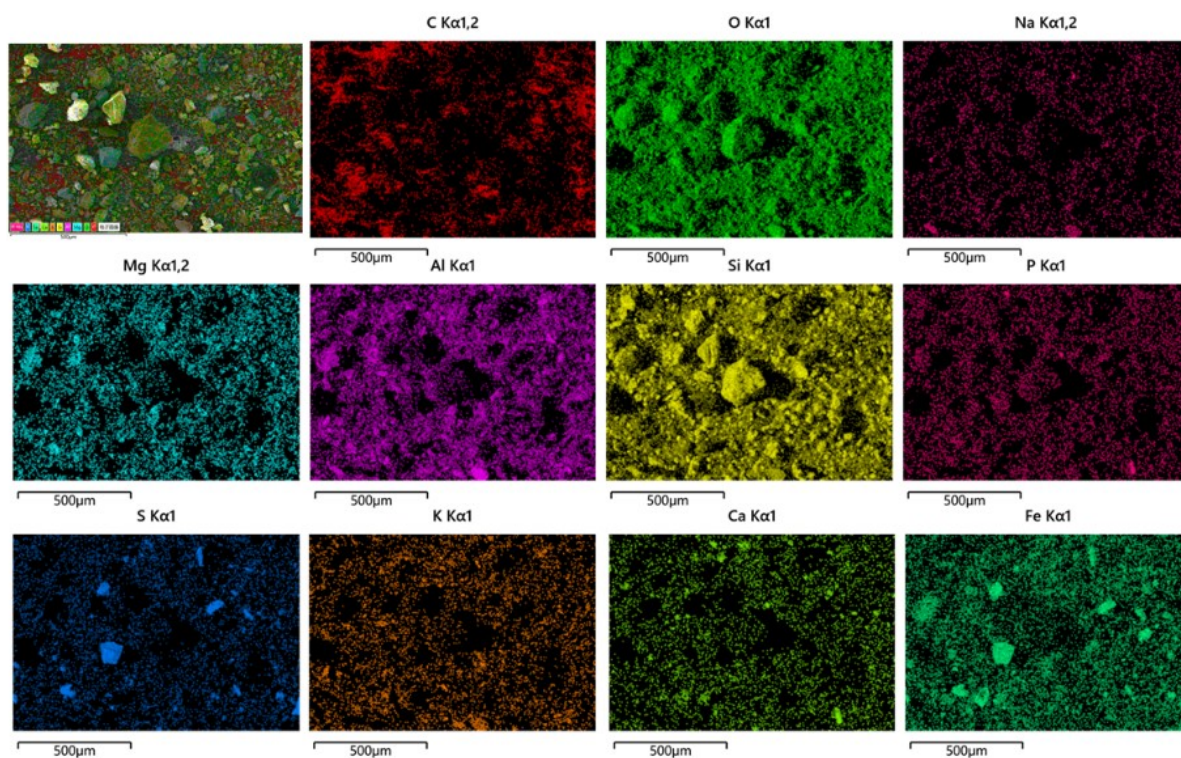

**Fig. S5.** EDS elemental mapping of CTC

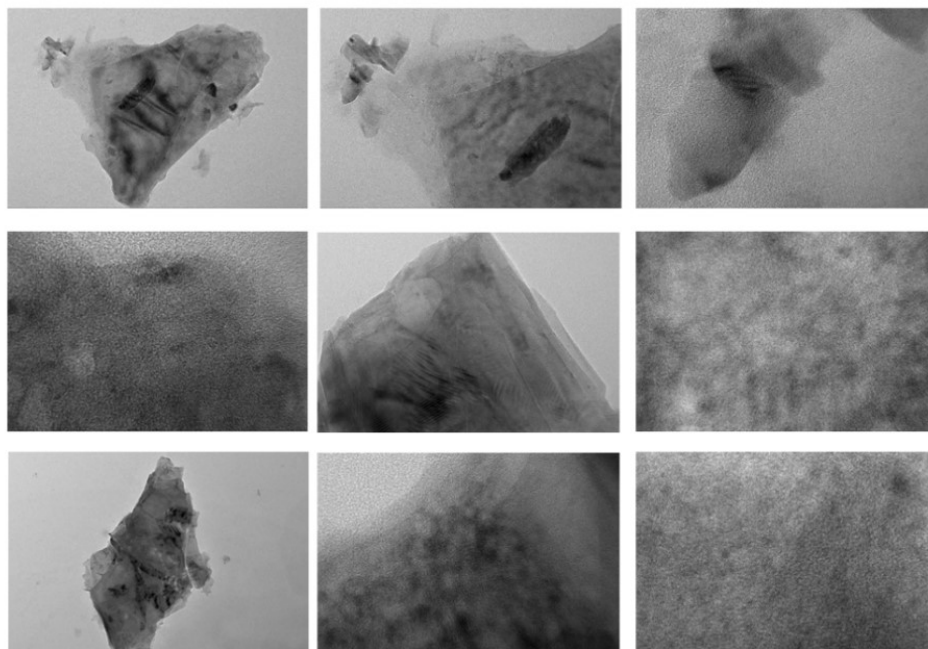

**Fig. S6.** TEM image of CTC

**H<sub>2</sub>-TPR(TPD) Specific Test:** A 100 mg aliquot of the sample was weighed and loaded into a quartz reaction tube. Dry and pretreat by programmed heating from room temperature to 500 °C at a rate of 10 °C/min. Purge with a helium flow (30-50 mL/min) for 1 hour, cool to 50 °C, then saturate with a 10% H<sub>2</sub>/Ar mixed gas (30-50 mL/min) for 1 h. Switch to an argon flow (30-50 mL/min) and purge for 1 hour to remove weakly physically adsorbed H<sub>2</sub> from the surface. Finally, desorb *via* heating to 800 °C at a rate of 10°C/min under an argon atmosphere, and detect the desorbed gas using a TCD.

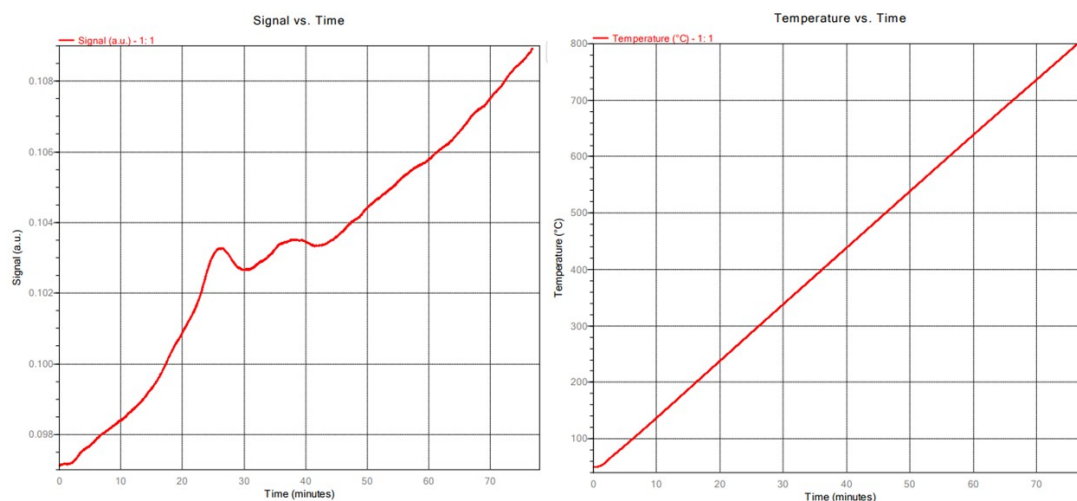

**Fig. S7.** TPR (H<sub>2</sub>-TPR) curves of 4% Co/CTC

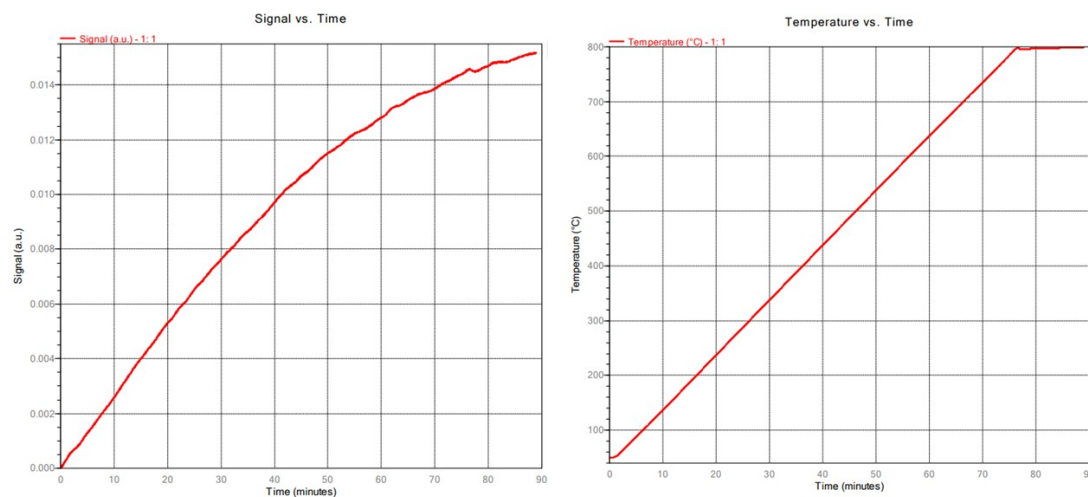

**Fig. S8.** TPD (H<sub>2</sub>-TPD) curves of 4% Co/CTC

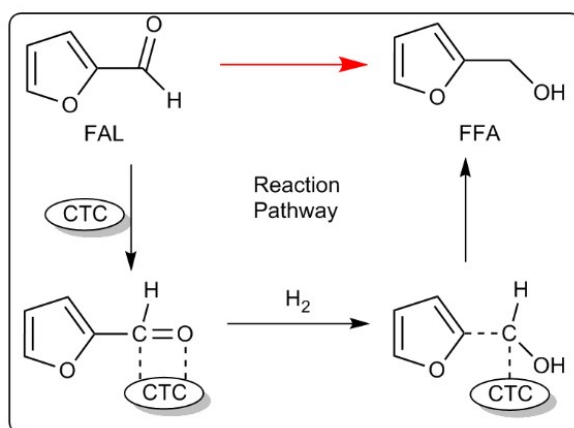

**Fig. S9.** The possible reaction mechanism for hydrogenolysis of FAL to FFA over the CTC.

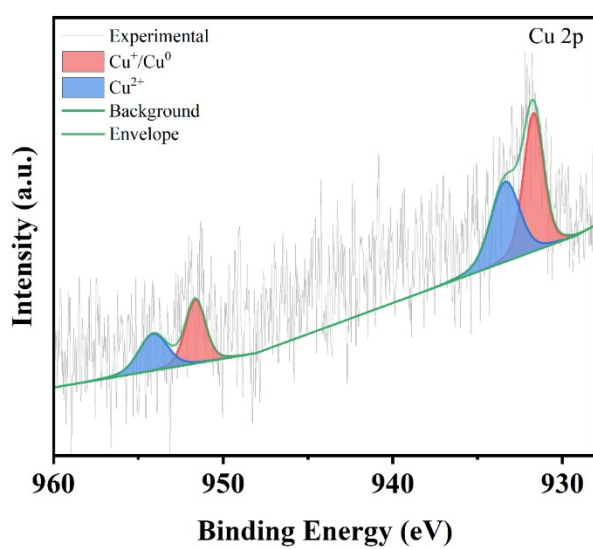

**Fig. S10.** XPS spectra in the Cu 2p region of the CTC.

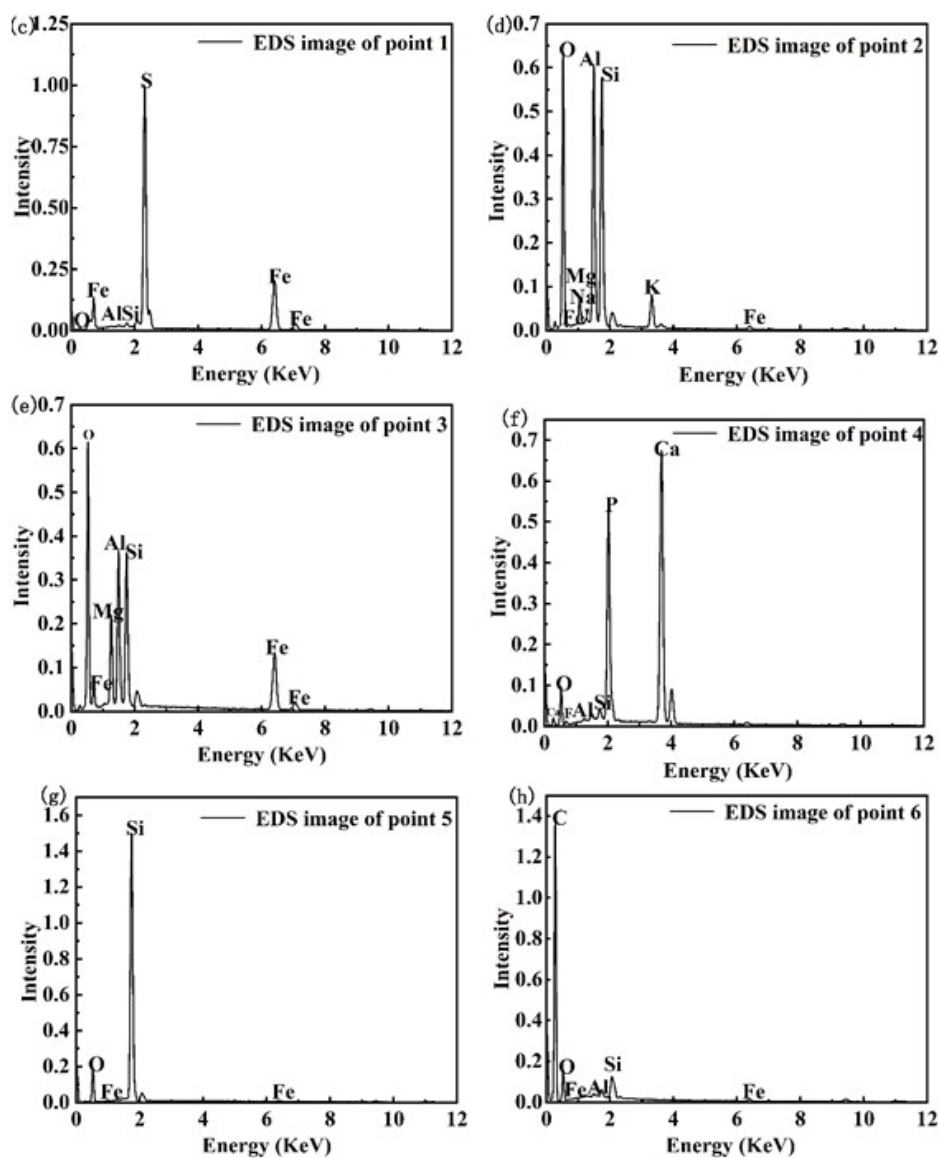

**Fig. S11.** EDS point analysis of the CTC at six representative positions.

**Table S1.** Effect of gas on the catalytic reaction over CTC.

| Entry | Gas            | Conv. (%) | Sel. (%) |      |        |
|-------|----------------|-----------|----------|------|--------|
|       |                |           | FFA      | THFA | Others |
| 1     | H <sub>2</sub> | 98        | 80       | 0    | 20     |
| 2     | N <sub>2</sub> | 2         | 0        | 0    | 100    |

Reaction conditions: 1 mmol furfural, 500 mg catalyst, 200 °C, 3.0 MPa gas, 72 h, 10 mL IPA.
